# Supplementary material
Source: Elsevier journal article supplement (https://www.sciencedirect.com/science/article/pii/S225555361500141X)
Supplement: mmc1 [file S225555361500141X:mmc1.docx]

**Anexo 1**

**Versão curta do Inventário de Necessidades da Família na Unidade de Cuidados Intensivos Neonatais (UCIN)**

Por favor assinale (X) quão IMPORTANTE é, para si, cada uma das seguintes necessidades

|  | Nada importante | Pouco importante | Importante | Muito importante | Não se aplica |
| --- | --- | --- | --- | --- | --- |
|  | (1) | (2) | (3) | (4) | (5) |
| **1** – Poder entrar na unidade em qualquer altura. | ________ | ________ | ________ | ________ | _____ |
| **2** – Falar com o médico responsável pelo meu bebé todos os dias. | ________ | ________ | ________ | ________ | _____ |
| **3** – Ter uma sala de espera na unidade. | ________ | ________ | ________ | ________ | _____ |
| **4** – Saber quem são os profissionais que me podem dar informações sobre a saúde e bem-estar do meu bebé. | ________ | ________ | ________ | ________ | _____ |
| **5** – Ter um profissional específico a quem telefonar no hospital quando não posso visitar o meu bebé. | ________ | ________ | ________ | ________ | _____ |
| **6** – Estar disponível um grupo de apoio constituído por outras famílias. | ________ | ________ | ________ | ________ | _____ |
| **7** – Ter aulas sobre bebés prematuros e as suas necessidades de cuidados especiais. | ________ | ________ | ________ | ________ | _____ |
| **8** – Ter outra pessoa comigo quando visito a UCIN. | ________ | ________ | ________ | ________ | _____ |
| **9** – Saber exatamente o que está a ser feito pelo meu bebé. | ________ | ________ | ________ | ________ | _____ |
| **10** – Ter móveis confortáveis na sala de espera. | ________ | ________ | ________ | ________ | _____ |
| **11** – Receber a visita de um padre, pastor ou outra pessoa da minha comunidade religiosa. | ________ | ________ | ________ | ________ | _____ |
| **12** – Ter um telefone perto da sala de espera. | ________ | ________ | ________ | ________ | _____ |
| **13** – Sentir que sou aceite pelos profissionais do hospital. | ________ | ________ | ________ | ________ | _____ |
| **14** – Darem-me informação acerca de pessoas que possam ajudar a lidar com problemas relacionados com a minha situação. | ________ | ________ | ________ | ________ | _____ |
| **15** – Falar com o/a mesmo/a enfermeiro/a na maioria das vezes. | ________ | ________ | ________ | ________ | _____ |
| **16** – Falar acerca da possibilidade do meu bebé morrer. | ________ | ________ | ________ | ________ | _____ |
| **17** – Ter cadeiras confortáveis ao lado do berço ou incubadora do meu bebé. | ________ | ________ | ________ | ________ | _____ |
| **18** – Darem-me material para ler sobre a situação médica do meu bebé. | ________ | ________ | ________ | ________ | _____ |
| **19** – Permitirem-me ajudar nos cuidados físicos prestados ao meu bebé. | ________ | ________ | ________ | ________ | _____ |
| **20** – Ter um espaço para dormir perto da UCIN. | ________ | ________ | ________ | ________ | _____ |
| **21** – Saber que o meu bebé está a receber medicação para a dor. | ________ | ________ | ________ | ________ | _____ |
| **22** – Ter um espaço para estar sozinho(a) enquanto estou no hospital. | ________ | ________ | ________ | ________ | _____ |
